# Supplementary material
Source: publisher figshare collection journal article supplement (https://future-science-group.figshare.com/ndownloader/files/28380051)

## Supplementary Figure 1. Trial Selection Process

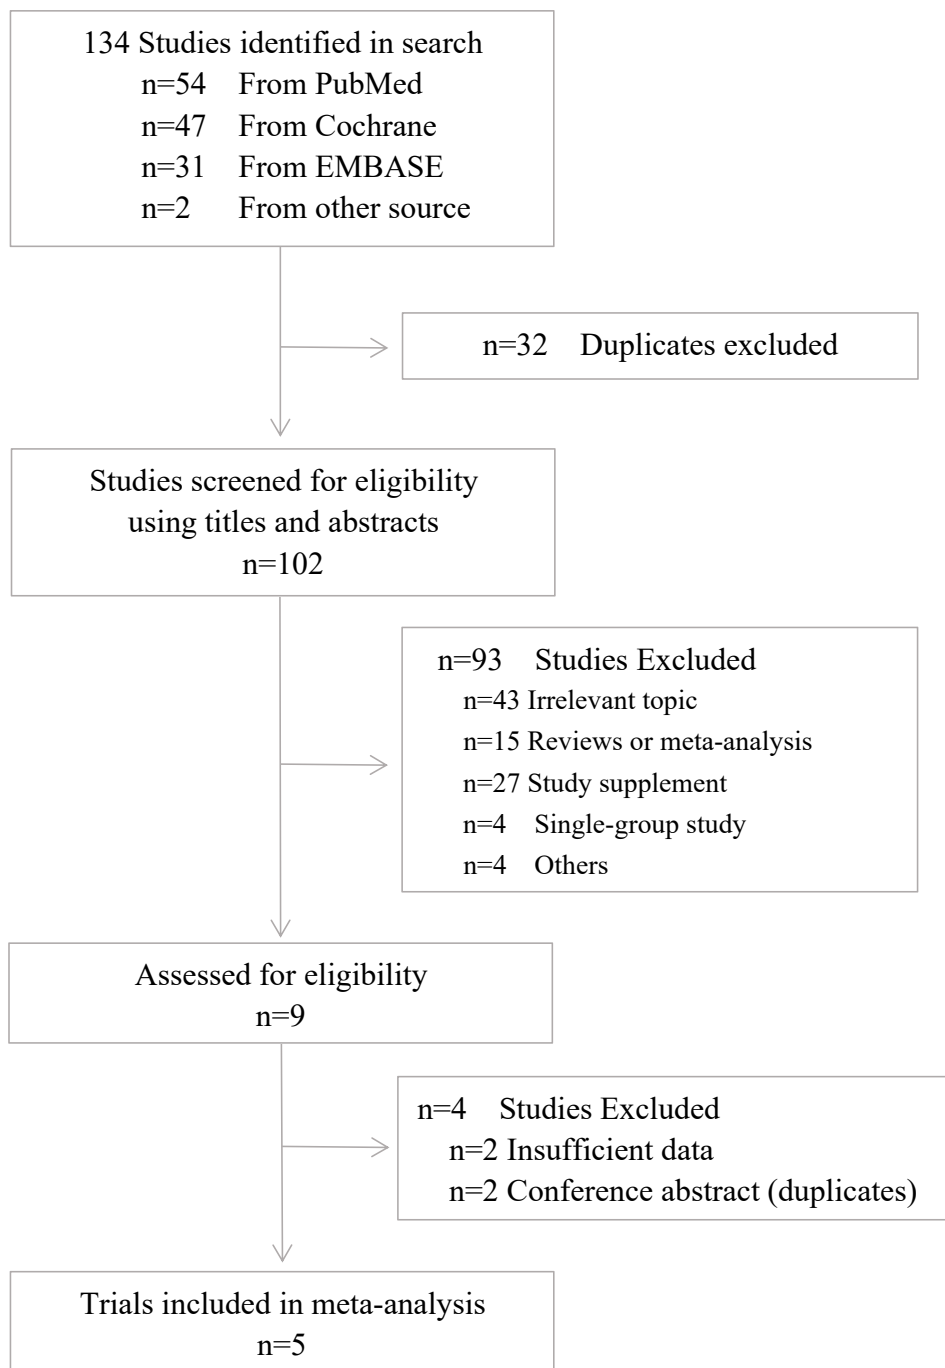

## Supplementary Figure 2. Funnel Plot comparing Hazard Ratios for Overall Survival and Progression-free Survival, and Risk Ratios for Objective Response Rate.

### A. Overall Survival

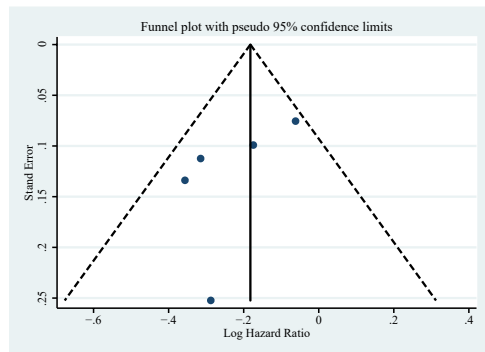

### B. Progression-free Survival

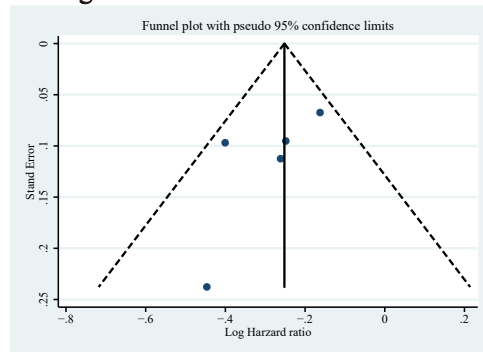

### A. Objective Response Rate

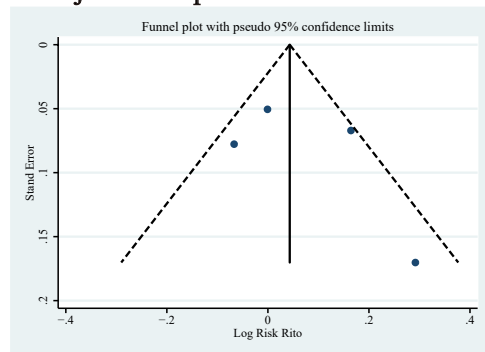

**Supplementary Figure 3.** Egger's publication bias plot for Overall Survival (OS), Progression-free Survival (PFS) and Objective Response Rate (ORR).

**A. OS**

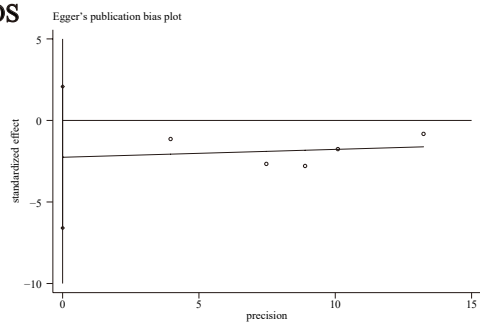

**B. PFS**

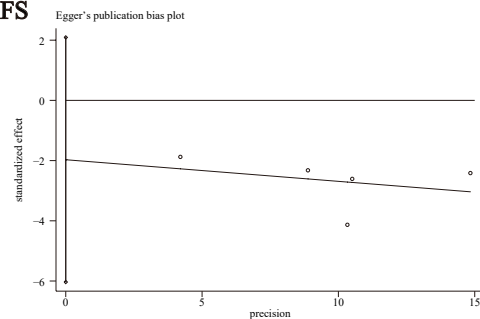

**C. ORR**

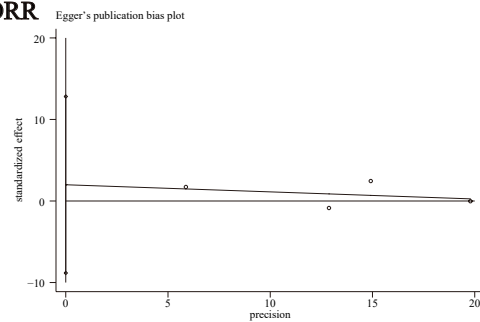

**Supplementary Figure 4.** Sensitivity analyses of Overall Survival (OS), Progression-free Survival (PFS) and Objective Response Rate (ORR) by repeating the pooled analyses with one study omitted at a time.

**A. OS**

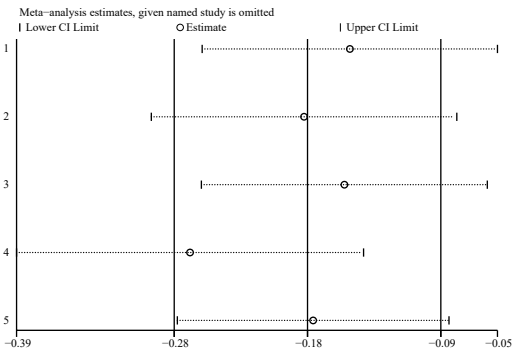

**B. PFS**

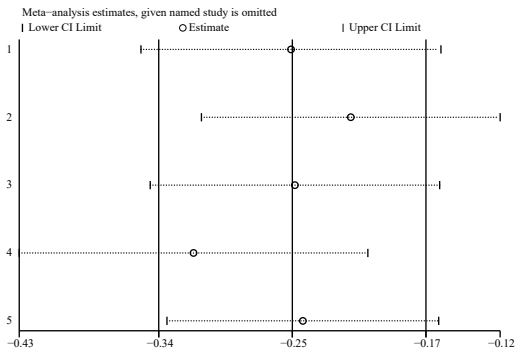

**C. ORR**

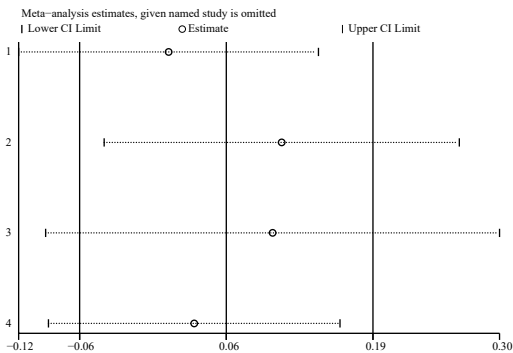

Supplement: Supplementary file 1 [file 28380051]
